# Supplementary material for: A lipid droplet specific fluorescent probe for image-guided photodynamic therapy under hypoxia
Source: Royal Society of Chemistry journal article supplement (doi:10.1039/d1tb01995c), 2021-01-01
Supplement: d1tb01995c1.pdf [file d1tb01995c1.pdf]

## **A Lipid Droplets Specific Fluorescent Probe for Image-Guided Photodynamic Therapy under Hypoxia**

Weihua Zhuang<sup>†, a, b</sup>, Ping Tan<sup>†, c</sup>, Shufen Li,<sup>a</sup> Chengming Li,<sup>a</sup> Jiapeng Zhang,<sup>c</sup> Jianzhong Ai,<sup>c</sup> Lu Yang,<sup>c</sup> Gaocan Li,<sup>b</sup> Qiang Wei,<sup>\*c</sup> Mao Chen<sup>\*a, d</sup>, and Yunbing Wang<sup>b</sup>

<sup>a</sup> Laboratory of Heart Valve Disease, West China Hospital, Sichuan University, 37 Guoxue Road, Chengdu 610041, PR China. E-mail: hmaochen@vip.sina.com

<sup>b</sup> National Engineering Research Center for Biomaterials, Sichuan University, 29 Wangjiang Road, Chengdu 610064, PR China.

<sup>c</sup> Department of Urology, Institute of Urology, Huaxi MR Research Center (HMRRC), State Key Laboratory of Biotherapy and Cancer Center, West China Hospital, Sichuan University, 37 Guoxue Road, Chengdu 610041, PR China. E-mail: weiqiang@scu.edu.cn.

<sup>d</sup> Department of Cardiology, West China Hospital, Sichuan University, 37 Guoxue Road, Chengdu 610041, PR China.

<sup>†</sup>These authors contributed equally to this work.

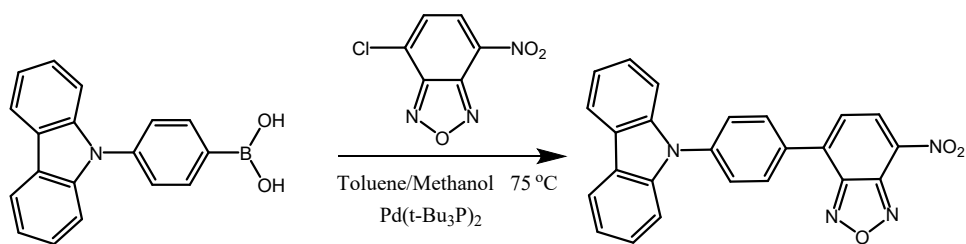

Fig. S1. Synthetic route of CPNBD.

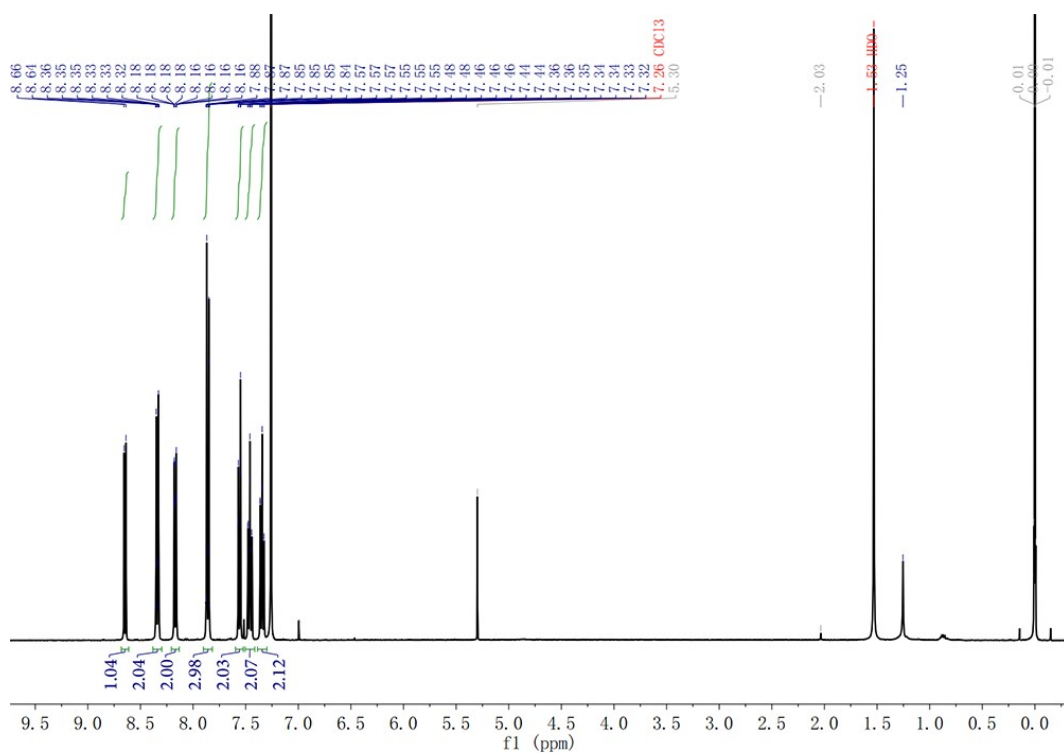

Fig. S2. <sup>1</sup>H NMR spectrum of CPNBD in CDCl<sub>3</sub>.

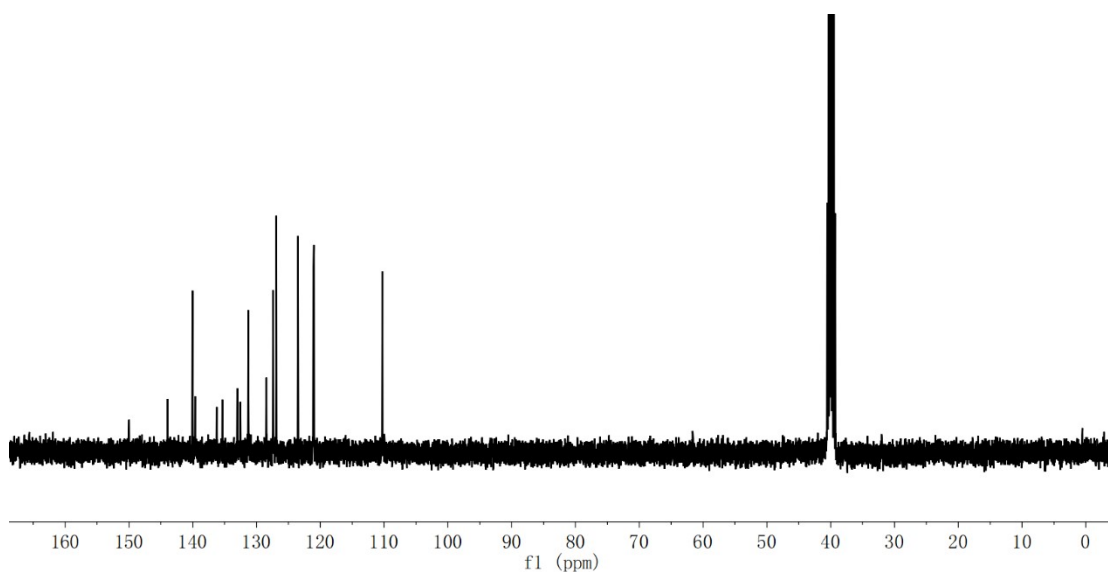

Fig. S3. <sup>13</sup>C NMR spectrum of CPNBD in DMSO-*d*<sub>6</sub>.

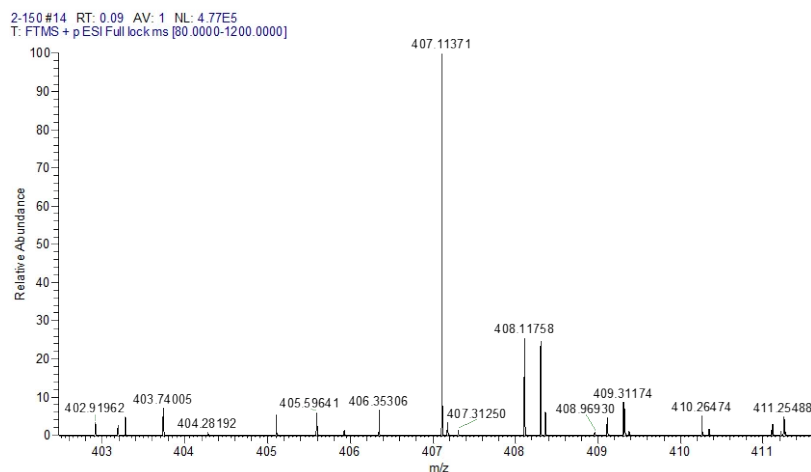

Fig. S4. HR-MS of CPNBD.

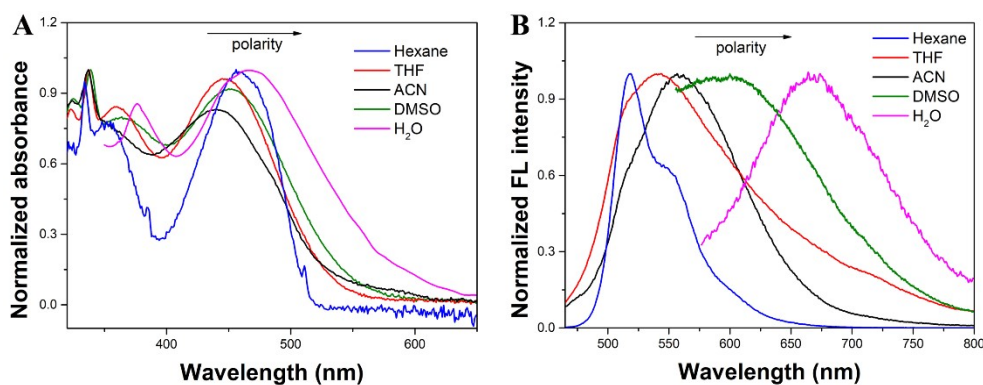

Fig. S5. Normalized UV-vis absorption spectra (A) and normalized FL spectra (B) of CPNBD in different solvents with various polarity. CPNBD exhibited very low fluorescence emission in DMSO, which was near the raman peaks and it was hard to normalize. Thus, the raman peaks were not shown in (B).

Table S1 photophysical properties of CPNBD.

| probe | $\lambda_{\text{abs}}/\text{nm}$ ( $\epsilon/10^3 \text{ M}^{-1} \text{ cm}^{-1}$ ) | $\lambda_{\text{em}}/\text{nm}$ ( $\text{H}_2\text{O}$ ) | $\lambda_{\text{ex max}}/\text{nm}$ (oil) | $\Phi_f$ (%)         |       |       | $\Phi\Delta$ |
|-------|-------------------------------------------------------------------------------------|----------------------------------------------------------|-------------------------------------------|----------------------|-------|-------|--------------|
|       |                                                                                     |                                                          |                                           | $\text{H}_2\text{O}$ | oil   | solid |              |
| CPNBD | 9.51735                                                                             | 470                                                      | 605                                       | $\approx 0$          | 15.83 | 1.17  | 0.135        |

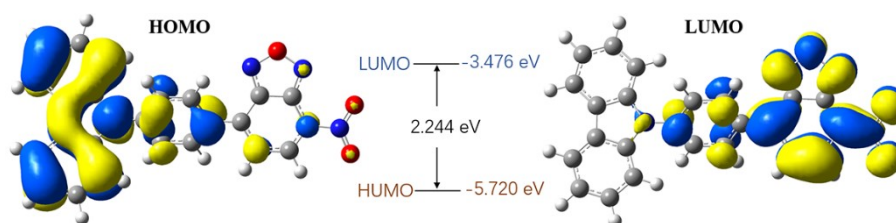

Fig. S6. DFT simulation of HOMO and LUMO energy levels of CPNBD (in toluene).

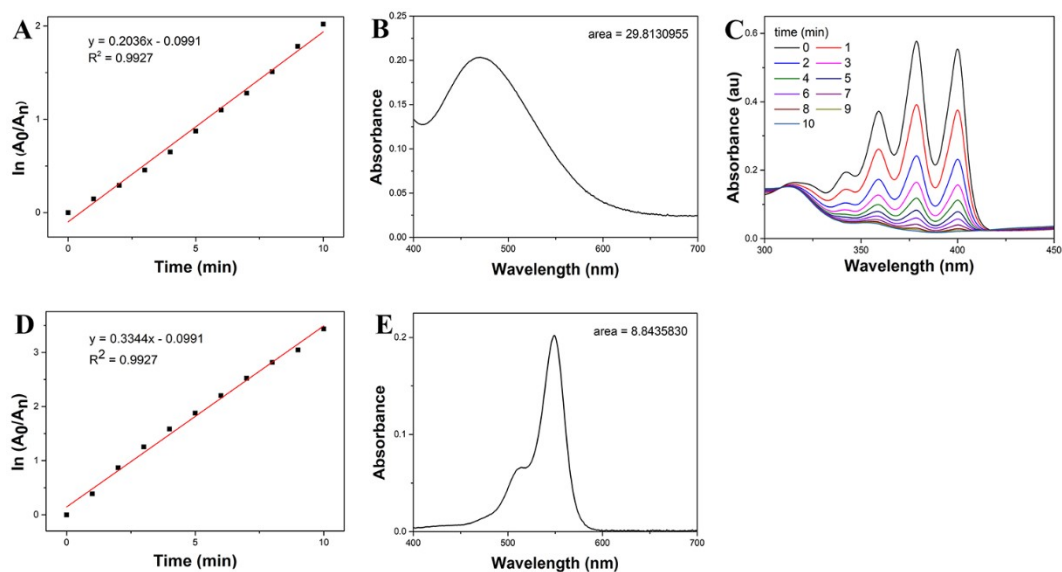

Fig. S7. The absorbance decay of the ABDA at 378 nm under white light irradiation (10 mW.cm<sup>-2</sup>) in the presence of **CPNBD** (A). The absorption spectrum of CPNBD ranged in 400-700 nm (B). The absorbance decay of the ABDA at 378 nm under white light irradiation (10 mW.cm<sup>-2</sup>) in the presence of Rose Bengal (C). The absorbance decay of the ABDA at 378 nm under white light irradiation (10 mW.cm<sup>-2</sup>) in the presence of Rose Bengal (D). The absorption spectrum of Rose Bengal ranged in 400–700 nm (E).

**Table S2** Theoretically calculated energy level and energy gap of **CPNBD** (B3LYP/6-31G\* level).

| $S_n$ | Energy (eV) | $T_n$ | Energy (eV) | $S_1/T_n$ | $S_1/T_n$ Energy gap |
|-------|-------------|-------|-------------|-----------|----------------------|
| $S_1$ | 1.96        | $T_1$ | 1.64        | $S_1/T_1$ | 0.32                 |
| $S_2$ | 2.27        | $T_2$ | 2.11        | $S_1/T_2$ | -0.15                |
| $S_3$ | 3.22        | $T_3$ | 2.26        | $S_1/T_3$ | -0.64                |
| $S_4$ | 3.31        | $T_4$ | 2.65        | $S_1/T_4$ | -0.69                |
| $S_5$ | 3.37        | $T_5$ | 2.95        | $S_1/T_5$ | -0.99                |
| $S_6$ | 3.48        | $T_6$ | 3.16        | $S_1/T_6$ | -1.20                |
| $S_7$ | 3.64        | $T_7$ | 3.27        | $S_1/T_7$ | -1.31                |
| $S_8$ | 3.87        | $T_8$ | 3.30        | $S_1/T_8$ | -1.34                |

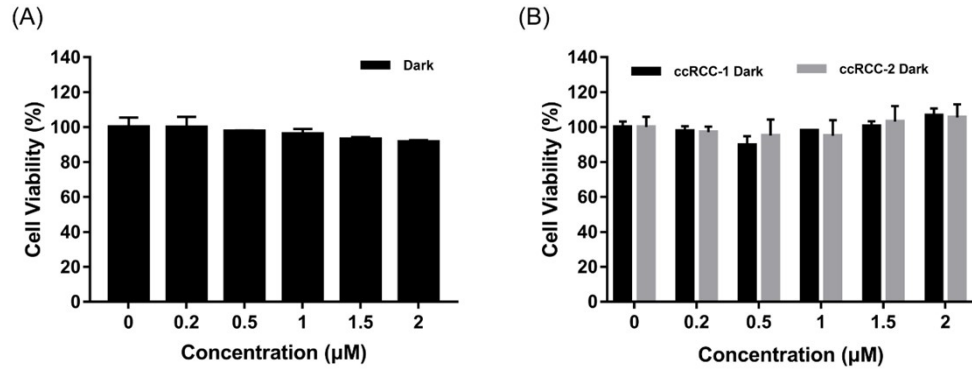

Fig. S8. Cell viability of (A) 786-O cells and (B) human primary ccRCC tumor cells incubated with different concentrations of **CNPBD** for 24 h.

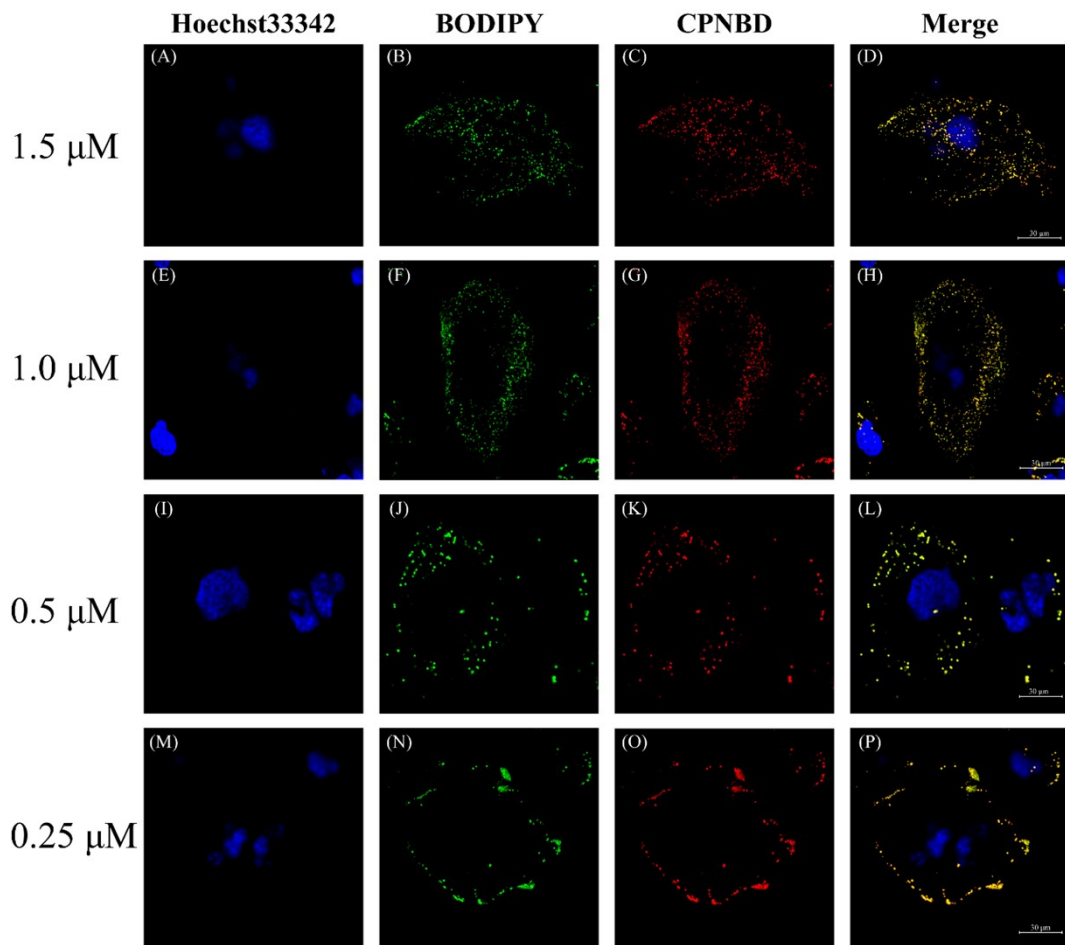

Fig. S9. Colocalization imaging of 786-O cells stained with Hoechst 33342 ( $\lambda_{\text{ex}} = 405$  nm), BODIPY 493/503 ( $\lambda_{\text{ex}} = 488$  nm, 100 nM) and different concentrations of **CNPBD** ( $\lambda_{\text{ex}} = 488$  nm) (A-D) 1.5 µM, (E-H) 1.0 µM, (I-L) 0.5 µM, and (M-P) 0.25 µM. Scale bar, 30 µm.  $\lambda_{\text{ex}} = 488$  nm. Pearson's coefficients ( $R_r$ ) of Figure S2D, S2H, S2L and S2P were calculated as 99.54%, 99.57%, 99.82% and 99.49%, respectively. Manders' coefficients ( $m_1$  and  $m_2$ ) of Figure S2D, S2H, S2L and S2P were calculated as 0.99 and 0.97, 0.99 and 0.97, 0.99 and 0.97, 0.99 and 0.97, respectively.

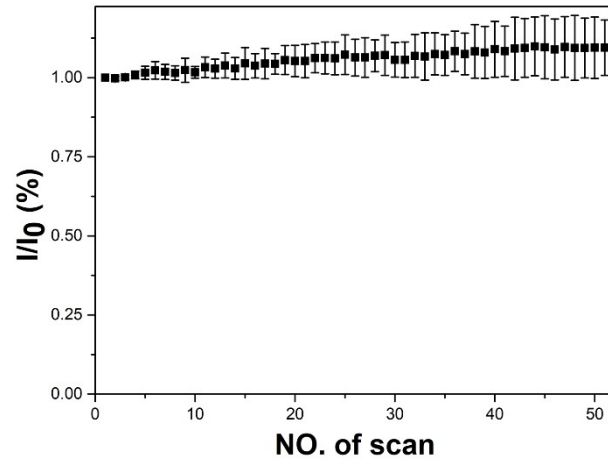

Fig. S10. Remaining emission intensity ( $I/I_0$ ) of **CPNBD** ( $2 \mu\text{M}$ ) in 786-O cells with the increasing irradiation time (scanning time: 6.1 s per scan).  $\lambda_{\text{ex}} = 488 \text{ nm}$ .

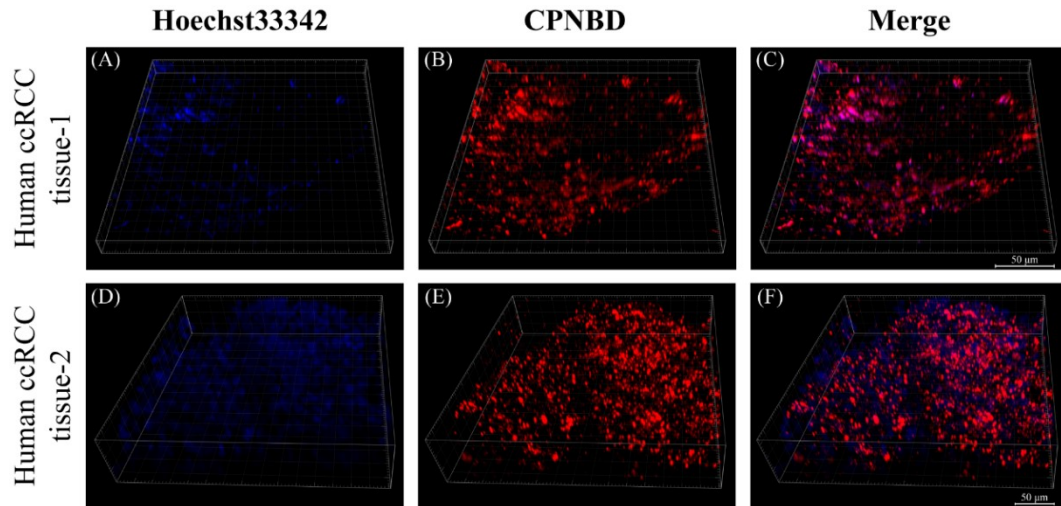

Fig. S11. Representative images of human ccRCC tumor tissues stained with Hoechst 33342 ( $\lambda_{\text{ex}} = 405 \text{ nm}$ ,  $\lambda_{\text{em}} = 500\text{-}550 \text{ nm}$ ) and **CPNBD** ( $\lambda_{\text{ex}} = 488 \text{ nm}$ ,  $\lambda_{\text{em}} = 570\text{-}620 \text{ nm}$ ) in (A-C) patient 1 and (D-F) patient 2. Scale bar,  $50 \mu\text{m}$ .



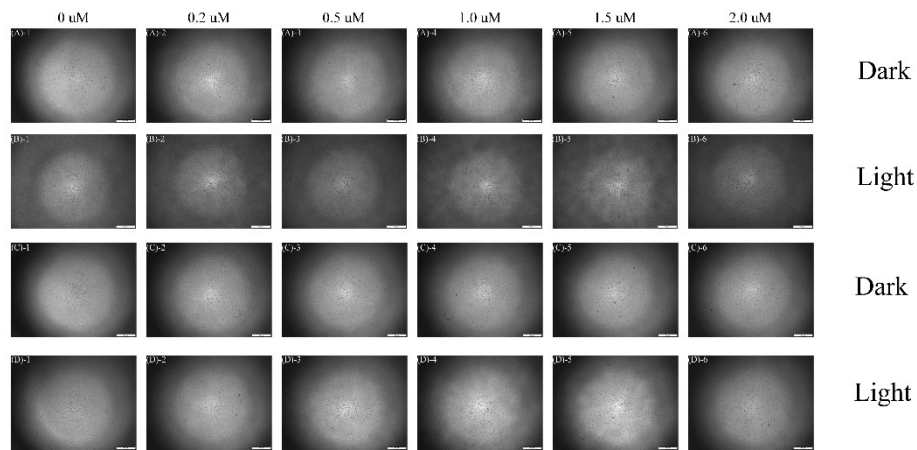

Fig. S12. Cytotoxicity of human primary ccRCC tumor cells from (A-1 to B-6) patient 1 and (C-1 to D-6) patient 2 incubated by different concentrations of CPNBD (B1-6, D1-6) with or (A1-6, C1-6) without white radiation for 30 min. Scale bar, 500  $\mu\text{m}$ .

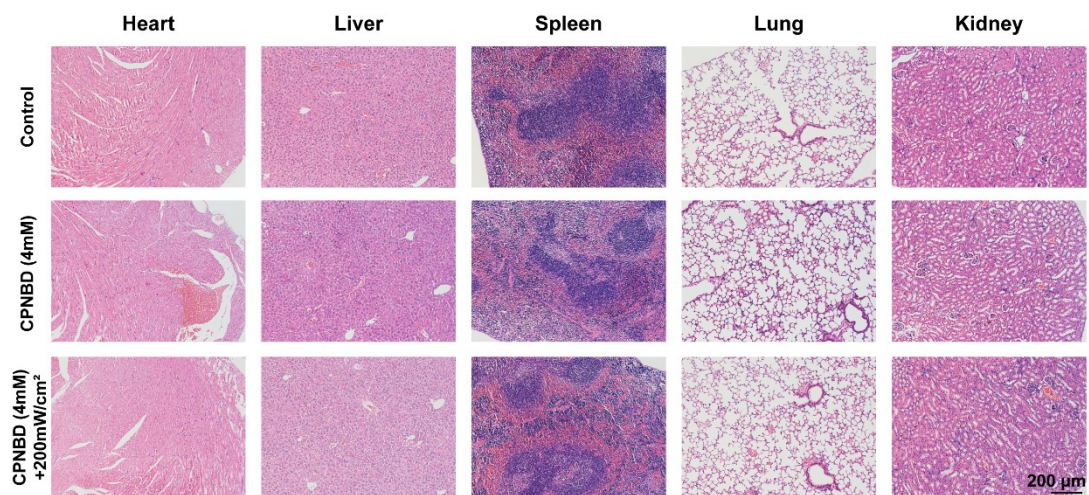

Fig. S13. Representative images of H&E stained main organs from mice after different treatments. Scale bar, 200  $\mu\text{m}$ .
